# Supplementary material for: Assessing the Efficacy of Cryptocurrency Applications’ Affiliate Marketing Process on Supply Chain Firms’ Website Visibility
Source: MDPI journal article supplement (doi:10.3390/su15097326), 2023-04-28
Supplement: s1 [file s1]

## Supplementary Materials

**Table S1.** Java coding route of supply chain and cryptocurrency wallet applications' simulation.

---

Java coding route of Anylogic

---

@Override

@AnyLogicInternalCodegenAPI

public void enterState( short \_state, boolean \_destination ) {

switch( \_state ) {

case PotentialWalletVisitors: // (Simple state (not composite))

statechart.setActiveState\_xjal( PotentialWalletVisitors );

{

cryptoWalletWebsiteVisitorl++

;}

transition.start();

return;

case WalletBrandedTraffic: // (Simple state (not composite))

statechart.setActiveState\_xjal( WalletBrandedTraffic );

{

WalletReferralDomains = normal(791.4857826 , 825.047692);

WalletBacklinks = normal(295604.8256915 , 755196.345385);

WalletExternalLinks = normal(0.2328255 , 0.329231);

WalletInternalLinks = normal(0.86197 , 1.176154);

cryptoWalletBrandedTraffic = cryptoWalletWebsiteVisitor

;}

transition1.start();

transition10.start();

return;

case WalletReferralTraffic: // (Simple state (not composite))

statechart.setActiveState\_xjal( WalletReferralTraffic );

{

cryptoWalletReferralTraffic = normal(2949.82177 , 8780.7914)

;}

transition2.start();

return;

case WalletOrganicTraffic: // (Simple state (not composite))

statechart.setActiveState\_xjal( WalletOrganicTraffic );

{

WalletAvgPagesVisit = 1.86 + WalletReferralDomains\*(-1.043) + WalletBacklinks\*(-0.069) +

WalletExternalLinks\*(0.061) + WalletInternalLinks\*(-0.043) +

cryptoWalletReferralTraffic\*(-0.040);

cryptoWalletAffiliateMarketingAnalytics = (WalletReferralDomains + WalletBacklinks +

WalletExternalLinks + WalletInternalLinks + cryptoWalletReferralTraffic)/4;

cryptoWalletOrganicTraffic = 1540387.2308 + WalletBacklinks\*(-0.851)

;}

transition4.start();

transition11.start();

return;

case WalletToSupplyChain: // (Simple state (not composite))

statechart.setActiveState\_xjal( WalletToSupplyChain );

transition5.start();

transition8.start();

return;

---

---

```

case SupplyChainReferralTraffic: // (Simple state (not composite))
    statechart.setActiveState_xjal( SupplyChainReferralTraffic );
    {
supplyChainReferralTraffic = 40302211.17 + WalletReferralDomains*(-0.131) + WalletBack-
links*(-0.449) + WalletExternalLinks*(1.249) + WalletInternalLinks*(-1.679) + cryptoWallet-
ReferralTraffic*(-0.294);
    ;}
        transition13.start();
        transition14.start();
        return;
case WalletBounceRate: // (Simple state (not composite))
    statechart.setActiveState_xjal( WalletBounceRate );
    transition3.start();
    return;
case SupplyChainBrandedTraffic: // (Simple state (not composite))
    statechart.setActiveState_xjal( SupplyChainBrandedTraffic );
    {
supplyChainBrandedTraffic = 75.11 + WalletBacklinks*(0.680) + WalletExternalLinks*(-
2.097) + WalletInternalLinks*(1.890)
    ;}
        transition9.start();
        return;
case SupplyChainSocialTraffic: // (Simple state (not composite))
    statechart.setActiveState_xjal( SupplyChainSocialTraffic );
    {
supplyChainSocialTraffic = 19700.0983 + WalletReferralDomains*(0.641) + WalletBack-
links*(1.426) + WalletExternalLinks*(-2.001) + WalletInternalLinks*(2.170) +
cryptoWalletRefer-ralTraffic*(-0.027);
    ;}
        transition7.start();
        transition12.start();
        return;
default:
    super.enterState( _state, _destination );
    return;
} }

```

---
